# Supplementary material
Source: Springer Nature journal article supplement (https://www.springermedizin.de/resource/supplementary/12936_2012_2544_MOESM3_ESM.pdf/9543106)

3D7-1

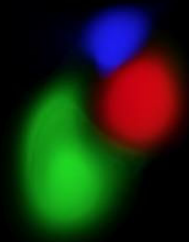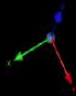

3D7-2

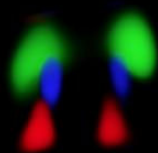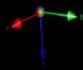

Dd2-1

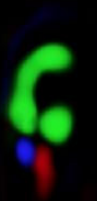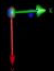

Dd2-2

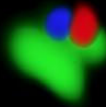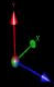

Supplement: MOESM3 [file 9543106]
